# Supplementary material
Source: Royal Society of Chemistry journal article supplement (doi:10.1039/d6tb00997b)
Supplement: d6tb00997b1.pdf [file d6tb00997b1.pdf]

## Supporting Information

### Crystallization of Lipidated Dexamethasone Prodrugs: The Linker Matters

Yanliang Dong<sup>a</sup>, Lei Shen<sup>b</sup>, Xiaoguang Shi<sup>a</sup>, Xiangyue Deng<sup>a</sup>, Weichao Shi<sup>b,c,\*</sup>, Shutao Guo<sup>a,\*</sup>

<sup>a</sup> Key Laboratory of Functional Polymer Materials of Ministry of Education, State Key Laboratory of Medicinal Chemical Biology, Frontiers Science Center for New Organic Matter, College of Chemistry, Nankai University, Tianjin, 300071, China.

<sup>b</sup> Key Laboratory of Functional Polymer Materials of Ministry of Education; Tianjin Key Laboratory of Functional Polymer Materials; Institute of Polymer Chemistry, College of Chemistry, Nankai University, Tianjin 300071, China.

<sup>c</sup> School of Physics, Nankai University, Tianjin 300071, China.

Corresponding authors: stguo@nankai.edu.cn; weichaoshi@nankai.edu.cn

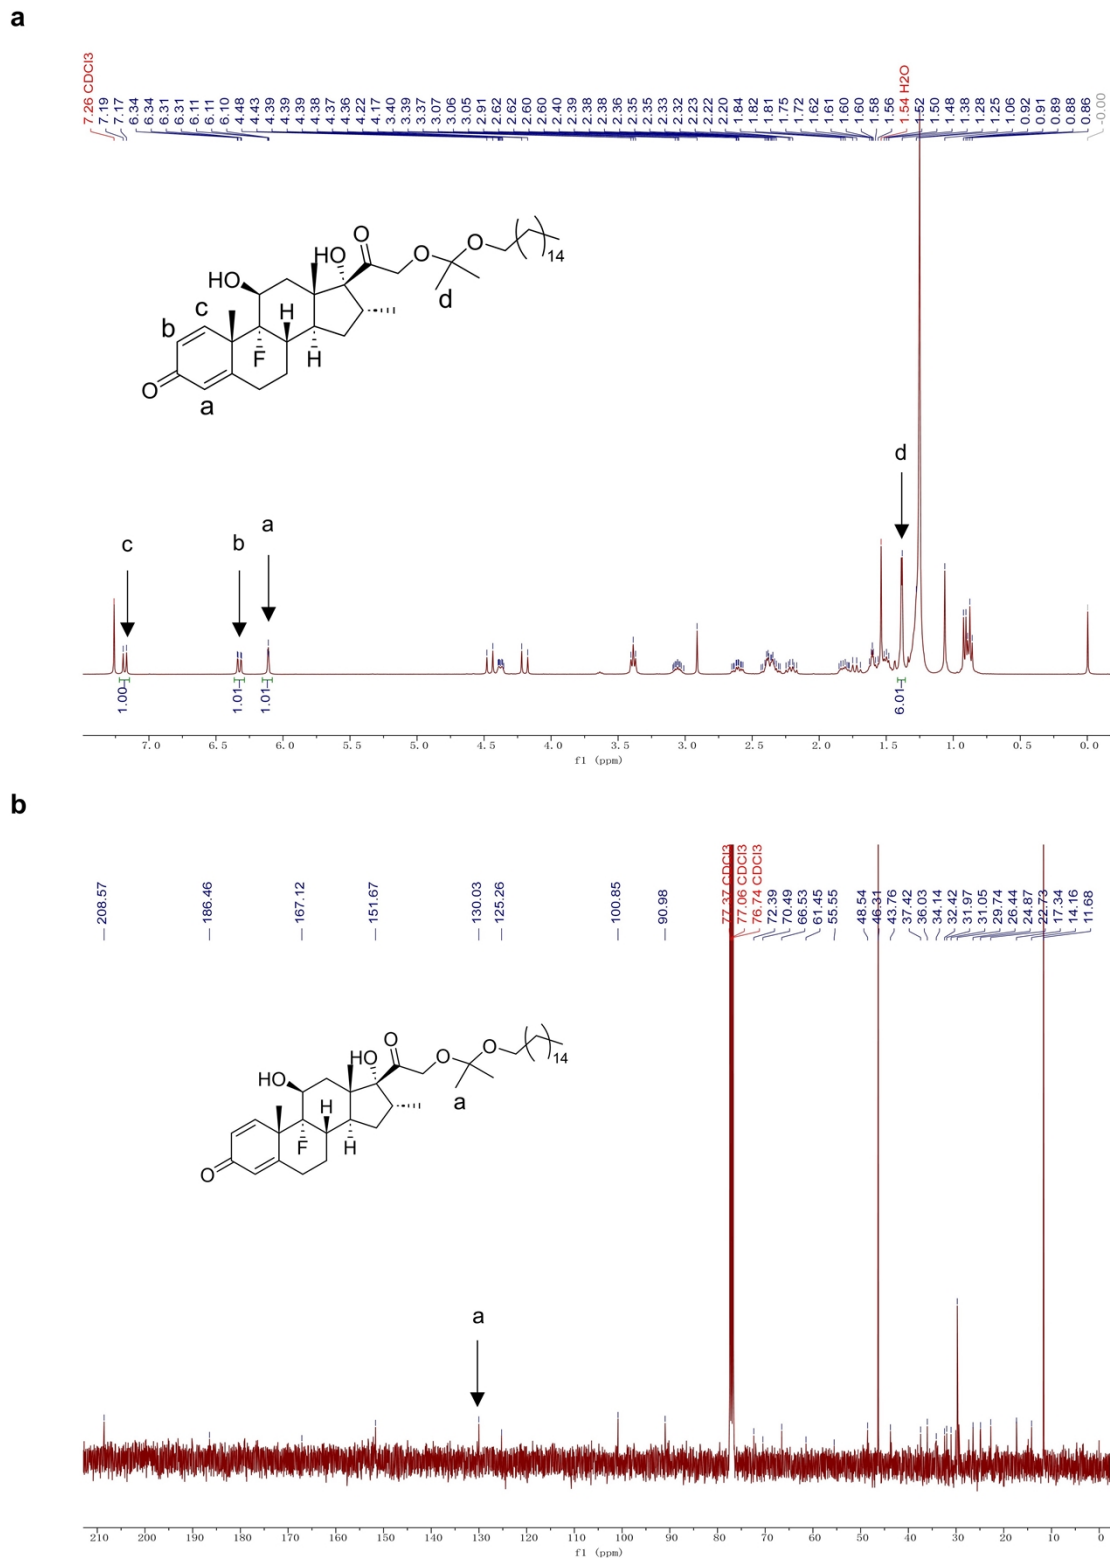

**Fig. S1** Characterization of PKD. (a)  $^1\text{H}$  NMR spectrum of PKD; (b)  $^{13}\text{C}$  NMR spectrum of PKD.

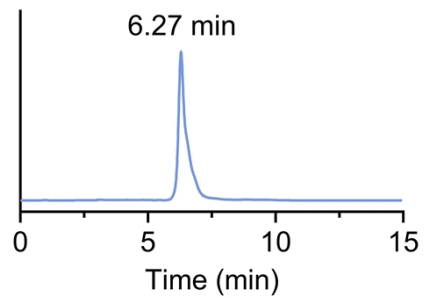

**Fig. S2** HPLC chromatograms of PKD (retention time: 6.27 min).

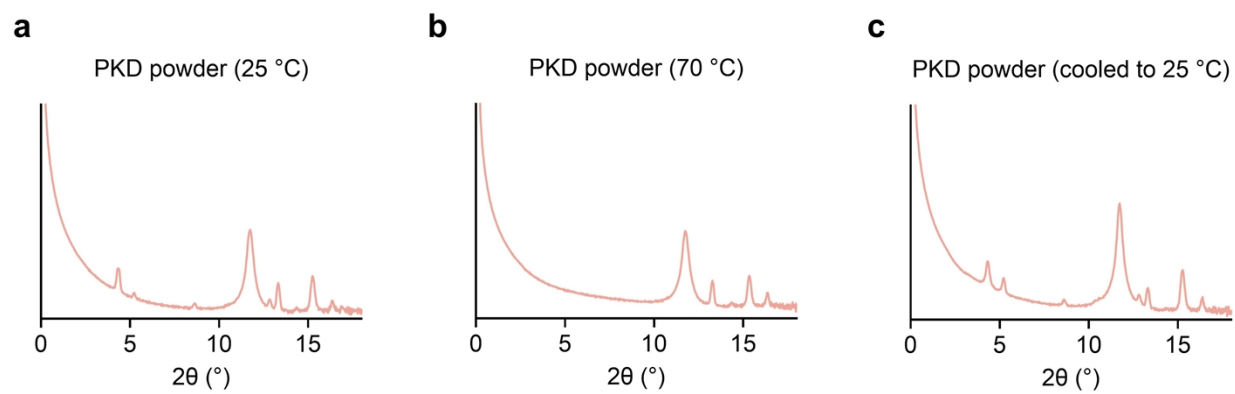

**Fig. S3** LAXS profiles of PKD powder at 25 °C (a), 70 °C (b), and after cooling back to 25 °C (c).

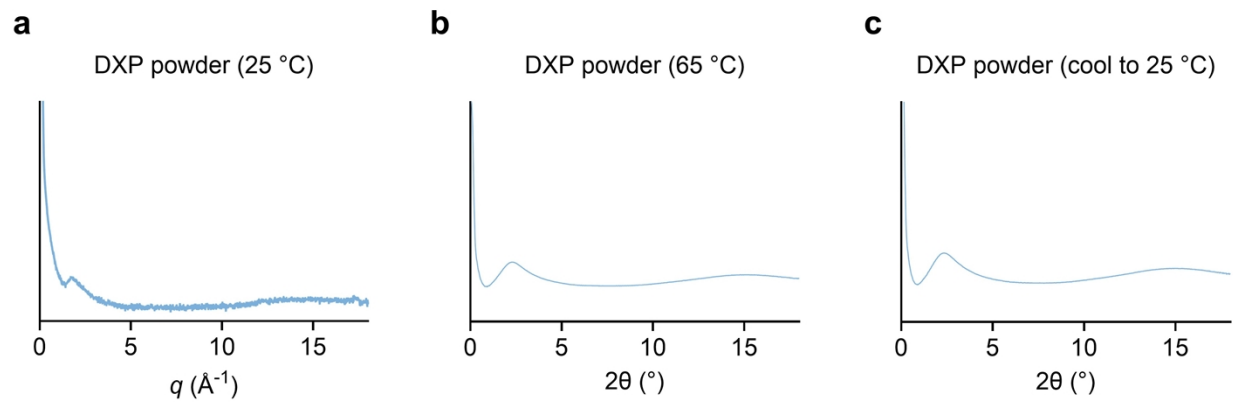

**Fig. S4** LAXS profiles of DXP powder at 25 °C (a), 65 °C (b), and after cooling back to 25 °C (c).

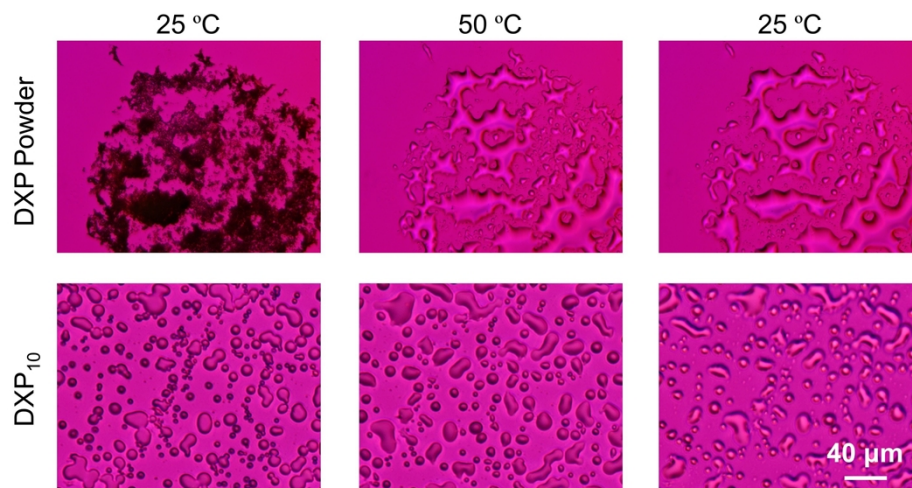

**Fig. S5** Temperature-dependent polarized optical microscopy images of DXP powder and DXP<sub>10</sub> aggregates, prepared from ethanolic solutions (10 mg/mL) at a solvent-to-antisolvent volume ratio of 1:2 (v/v), recorded at room temperature, at 50 °C, and after cooling back to room temperature.

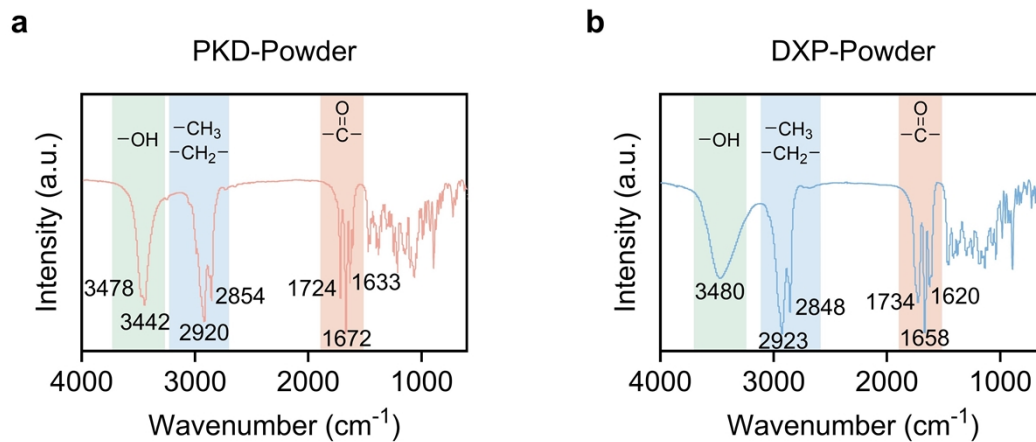

**Fig. S6** FT-IR spectra of PKD (a) and DXP (b) powder.

**Table. S1** Detailed parameters for the antisolvent treatment of PKD and DXP.

|                     | Initial concentration (mg/mL) | Solvent-to-antisolvent ratio (v/v) |
|---------------------|-------------------------------|------------------------------------|
| PKD <sub>50</sub>   | 50                            | 1:2                                |
| PKD <sub>25</sub>   | 25                            | 1:2                                |
| PKD <sub>10</sub>   | 10                            | 1:2                                |
| PKD <sub>1:2</sub>  | 10                            | 1:2                                |
| PKD <sub>1:5</sub>  | 10                            | 1:5                                |
| PKD <sub>1:10</sub> | 10                            | 1:10                               |
| DXP <sub>50</sub>   | 50                            | 1:2                                |
| DXP <sub>25</sub>   | 25                            | 1:2                                |
| DXP <sub>10</sub>   | 10                            | 1:2                                |
| DXP <sub>1:2</sub>  | 10                            | 1:2                                |
| DXP <sub>1:5</sub>  | 10                            | 1:5                                |
| DXP <sub>1:10</sub> | 10                            | 1:10                               |

**Table. S2** Parameter of PKD crystal measured via SCXRD.

| Parameter                   |                                                          |
|-----------------------------|----------------------------------------------------------|
| Formula, FW                 | C <sub>41</sub> H <sub>67</sub> FO <sub>6</sub> , 674.94 |
| Crystal system, space group | P2111, monoclinic                                        |
|                             | a = 19.06416 (17) Å                                      |
|                             | b = 7.98111 (10) Å                                       |
|                             | c = 25.6022 (3) Å                                        |
|                             | β = 98.4211° (8)                                         |
| Z, Z'                       | 4, 2                                                     |
| R                           | 0.03                                                     |
